# Supplementary material for: Water Complexes of Cytochrome P450: Insights from Energy Decomposition Analysis
Source: Molecules. 2013 Jun 10;18(6):6782–91. doi: 10.3390/molecules18066782 (PMC6270449; doi:10.3390/molecules18066782)
Supplement: Supplementary file 1 [file molecules-18-06782-s001.pdf]

# Supplementary Materials

## XYZ coordinates of optimized geometries

### Resting state (1)

|    |             |             |             |
|----|-------------|-------------|-------------|
| H  | 10.73533440 | 33.60361862 | 1.92623603  |
| S  | 9.73694611  | 32.81611633 | 2.38753700  |
| Fe | 10.50351238 | 30.86384010 | 1.62658095  |
| N  | 10.94798470 | 31.59665298 | -0.18784700 |
| N  | 12.41124439 | 31.22996330 | 2.19746804  |
| N  | 10.13799000 | 29.92940331 | 3.39059591  |
| N  | 8.67722702  | 30.30350685 | 1.00315797  |
| C  | 10.07916260 | 31.70023346 | -1.24495697 |
| C  | 10.72639275 | 32.35028076 | -2.36046195 |
| C  | 11.99533844 | 32.64094543 | -1.96484196 |
| C  | 12.12419891 | 32.17109680 | -0.60600001 |
| C  | 13.39723110 | 31.87138748 | 1.48016798  |
| C  | 14.57034683 | 32.05105209 | 2.29733300  |
| C  | 14.28213692 | 31.52644348 | 3.52145696  |
| C  | 12.93334770 | 31.02113724 | 3.45497108  |
| C  | 10.97835541 | 29.90678215 | 4.48099995  |
| C  | 10.32184219 | 29.27675247 | 5.60008001  |
| C  | 9.07286072  | 28.92896652 | 5.18205118  |
| C  | 8.96135044  | 29.34908485 | 3.80780911  |
| C  | 7.69866991  | 29.65620232 | 1.71698201  |
| C  | 6.50360107  | 29.51994133 | 0.91784501  |
| C  | 6.76853991  | 30.10012627 | -0.28345099 |
| C  | 8.12661171  | 30.58883667 | -0.22049101 |
| C  | 8.77002621  | 31.23806190 | -1.26520598 |
| H  | 8.20347691  | 31.39175797 | -2.17859292 |
| C  | 13.27249527 | 32.30047607 | 0.16472700  |
| H  | 14.13002968 | 32.78843307 | -0.28826699 |
| C  | 12.27427387 | 30.40625954 | 4.51267385  |
| H  | 12.81818962 | 30.31369972 | 5.44790411  |
| C  | 7.82397985  | 29.20394897 | 3.02413702  |
| H  | 6.96250296  | 28.71927643 | 3.47302794  |
| H  | 12.78325272 | 33.12716293 | -2.52607203 |
| H  | 10.25588322 | 32.54740906 | -3.31539392 |
| H  | 15.48630047 | 32.52355576 | 1.96560299  |
| H  | 14.91406059 | 31.48006439 | 4.39947510  |
| H  | 10.77069092 | 29.12979126 | 6.57437801  |
| H  | 8.28656292  | 28.43930435 | 5.74256992  |
| H  | 5.59127092  | 29.04128075 | 1.25050199  |
| H  | 6.11922789  | 30.19614220 | -1.14446604 |
| O  | 11.25768757 | 28.91538620 | 0.96324402  |
| H  | 10.96628475 | 28.39050293 | 1.73022103  |
| H  | 12.20640469 | 29.07636070 | 1.11366904  |

### Cpd I••H<sub>2</sub>O (2)

|    |             |             |             |
|----|-------------|-------------|-------------|
| H  | 1.65500498  | -0.10018000 | 2.49330401  |
| S  | 0.32352501  | -0.31982300 | 2.40528607  |
| Fe | 0.08299500  | 0.00973500  | -0.12181800 |
| N  | 1.27486098  | -1.62789905 | -0.05936700 |
| N  | -1.52521598 | -1.17739606 | 0.15897600  |
| N  | -1.07774997 | 1.63100195  | 0.12460600  |
| N  | 1.72421503  | 1.18269897  | -0.11085200 |
| C  | 2.64564204  | -1.65714395 | -0.18979099 |
| C  | 3.11361003  | -3.02046299 | -0.23882900 |
| C  | 2.01407290  | -3.81702209 | -0.15928499 |
| C  | 0.87096798  | -2.94361997 | -0.05766100 |
| C  | -1.55532300 | -2.54879904 | 0.13125800  |
| C  | -2.91199803 | -3.02335691 | 0.25375599  |
| C  | -3.70417690 | -1.92200994 | 0.35865900  |
| C  | -2.83169508 | -0.77601802 | 0.29130501  |
| C  | -2.43805504 | 1.65940595  | 0.26375800  |
| C  | -2.91170406 | 3.02009296  | 0.32567099  |
| C  | -1.81533897 | 3.81863809  | 0.21956401  |

|   |             |             |             |
|---|-------------|-------------|-------------|
| C | -0.67714202 | 2.94102407  | 0.09579400  |
| C | 1.75135398  | 2.55336189  | -0.11771500 |
| C | 3.10699010  | 3.02902293  | -0.24347900 |
| C | 3.90106106  | 1.92626202  | -0.32229900 |
| C | 3.02701211  | 0.78157002  | -0.24189501 |
| C | 3.46055102  | -0.54030102 | -0.27920100 |
| H | 4.52749014  | -0.71005499 | -0.38765001 |
| C | -0.44378501 | -3.37414098 | 0.01657800  |
| H | -0.61882401 | -4.44550085 | 0.00096000  |
| C | -3.25990200 | 0.54127502  | 0.34640300  |
| H | -4.32635307 | 0.71477598  | 0.44843099  |
| C | 0.63697100  | 3.37571812  | -0.01709600 |
| H | 0.80671901  | 4.44803476  | -0.02957500 |
| H | 1.96226001  | -4.89815903 | -0.16849799 |
| H | 4.15242481  | -3.31114006 | -0.32878199 |
| H | -3.20035911 | -4.06662607 | 0.26480001  |
| H | -4.77957106 | -1.87106097 | 0.46998200  |
| H | -3.94976592 | 3.30648398  | 0.43303800  |
| H | -1.76265597 | 4.89967585  | 0.22467600  |
| H | 3.39472890  | 4.07222223  | -0.26721099 |
| H | 4.97746420  | 1.87427104  | -0.42394301 |
| O | -0.02538800 | -0.00281600 | -1.74891198 |
| H | -1.66822898 | 0.43125701  | -2.61780405 |
| O | -2.58549690 | 0.38581800  | -2.95156407 |
| H | -2.69472194 | -0.55867499 | -3.13638306 |

### Water dimer (3)

|   |           |           |           |
|---|-----------|-----------|-----------|
| O | -0.014038 | 0.177981  | 0.088324  |
| H | 0.239554  | -0.111539 | 0.979257  |
| H | 0.774446  | 0.005137  | -0.450548 |
| O | -1.248545 | -2.299366 | -0.642059 |
| H | -0.973971 | -1.386442 | -0.428362 |
| H | -2.139855 | -2.198896 | -1.005662 |
